# Supplementary material
Source: PubMed Central journal article supplement (PMC4125386)
Supplement: f1a2b693fd535dc32b2a3952bf593018_genetics.114.164517-1.pdf [file f1a2b693fd535dc32b2a3952bf593018_genetics.114.164517-1.pdf]

## File S1

### Associations of LOH breakpoints with various elements of chromosome structure

In chromosomes with LOH events, the regions of transition likely contain the sites of the recombinogenic DNA lesion. Consequently, for each recombination event listed in Tables S2 and S4, we assigned “windows” likely to contain the initiating lesion; the method that we used is described in detail in Yin and Petes (2013). In brief, the window was defined from the leftmost coordinate of the first transition to the rightmost coordinate of the last transition. For example, in sector 1R/W, for the hybrid conversion tract on chromosome VII, the window is from SGD coordinates 663893 to 686220.

The *exo1* data for UV-induced recombination events (Table S2) was analyzed separately from the spontaneous events (Table S4). For each of the two datasets, we summed the sizes of all of the recombination windows. For the UV-induced samples, we restricted the analysis to unselected recombination events (those that did not occur on the left arm of chromosome V). This sum was 817,055 bp for these events. We examined 16 sectored colonies induced by UV, and the amount of genomic DNA (other than the left arm of chromosome V) that is represented on the SNP microarray is about 11.4 Mb. Thus, for the UV-induced events, the fraction of genomic DNA represented in the windows is  $817 \text{ kb} / (11.4 \times 16 \text{ Mb})$  or  $4.48 \times 10^{-3}$ . Based on the number and location of elements in the relevant region of the genome, we can then calculate the expected numbers of elements if they are randomly distributed with respect to the recombination windows. For example, from an examination of the location of palindromic sequences greater than 16 bp in length (Lisnic *et al.*, 2005), we calculate that there are 563 palindromes in the genomic region that does not include the right arm of V. Examining sixteen genomes, therefore, we expect, therefore, that there will be 40 palindromes located in the windows and 8968 located outside the windows (Table S5). We observed almost exactly these numbers (38 in the windows and 8970 outside of the windows). By chi-square analysis, there is no significant difference between the expectation and the observations. The comparable calculations were done using 13 other genetic elements (Table S5).

We performed a similar calculation with the spontaneous recombination events. The sum of the recombination windows for the spontaneous events selection on chromosome IV was 1,259,222 bp. The amount of DNA represented on the right arm of chromosome IV that is on the SNP microarray is 1,074,795 bp, and we examined a total of 109,629,090 bp ( $1,074,795 \text{ bp} \times 102$  sectored colonies). The windows, therefore, represent about  $1.14 \times 10^{-2}$  of the total DNA examined. We compared the observed

and expected chromosome elements within the windows, and outside of the windows as described above for UV-induced events. Since we performed multiple comparisons, we corrected  $p$  values using the method of Hochberg and Benjamini (1990). After this correction was applied, only one comparison was significant. Tandemly-arrayed repeats were significantly under-represented in the spontaneous crossovers.

The references for the number and location of various genomic elements are: ncRNAs, snoRNAs, snRNAs, retrotransposons, tRNA genes, centromeres, ARS elements, solo LTRs (SGD Website: <http://www.yeastgenome.org/cgi-bin/seqTools>); G4 quadruplex DNA (Capra *et al.*, 2010); strongly- and weakly-transcribed genes (Nagalakshmi *et al.*, 2008); Rrm3p pause sites (Azvolinsky *et al.*, 2008); gamma-H2AX peaks (Szilard *et al.*, 2010); TER sequences (Fachinetti *et al.*, 2010). The strongly- and weakly-transcribed genes were based on examining the transcription of genes within the analyzed area, and picking the top 5% and bottom 5% levels of transcription, respectively.

#### LITERATURE CITED

- Azvolinsky A., P. G. Giresi, J. D. Lieb, V. A. Zakian, 2009 Highly transcribed RNA polymerase II genes are impediments to replication fork progression in *Saccharomyces cerevisiae*. *Mol. Cell* 34: 722-734.
- Barbera M. A. and T. D. Petes, 2006 Selection and analysis of spontaneous reciprocal cross-overs in *Saccharomyces cerevisiae*. *Proc. Natl. Acad. Sci. U S A* 103: 12819-12824.
- Capra J.A., K. Paeschke, M. Singh, V. A. Zakian, 2010 G-quadruplex DNA sequences are evolutionarily conserved and associated with distinct genomic features in *Saccharomyces cerevisiae*. *PLoS Comput. Biol.* 6:e1000861.
- Casper A. M., P. W. Greenwell, W. Tang, T. D. Petes, 2009 Chromosome aberrations resulting from double-strand breaks at a naturally-occurring yeast fragile site composed of inverted Ty elements are independent of Mre11p and Sae2p. *Genetics* 183: 423-439.
- Fachinetti D., R. Bermejo, A. Cocito, S. Minardi, Y. Katou, *et al.*, 2010 Replication termination at eukaryotic chromosomes is mediated by Top2 and occurs at genomic loci containing pausing elements. *Mol. Cell* 39:595-605.
- Goldstein A. L. and J. H. McCusker, 1999 Three new dominant drug resistance cassettes for gene disruption in *Saccharomyces cerevisiae*. *Yeast* 15: 1541-1553.

- Hochberg Y. and Y. Benjamini, 1990 More powerful procedures for multiple significance testing. *Stat. Med.* 9: 811-818.
- Lee P.S., P. W. Greenwell, M. Dominska, M. Gawel, M. Hamilton, *et al.*, 2009 A fine-structure map of spontaneous mitotic crossovers in the yeast *Saccharomyces cerevisiae*. *PLoS Genet.* 5: e1000410.
- Lee P. S. and T. D. Petes, 2010 From the Cover: mitotic gene conversion events induced in G1-synchronized yeast cells by gamma rays are similar to spontaneous conversion events. *Proc. Natl. Acad. Sci. U S A* 107: 7383-7388.
- Lisnic B., I. K. Svetec, H. Saric, I. Nikolic, Z. Zgaga, 2005 Palindrome content of the yeast *Saccharomyces cerevisiae* genome. *Curr. Genet.* 47: 289-297.
- Longtine M. S., A. McKenzie, D. J. Demarini, N. G. Shah, A. Wach, *et al.*, 1998 Additional modules for versatile and economical PCR-based gene deletion and modification in *Saccharomyces cerevisiae*. *Yeast* 14: 953-961.
- Nagalakshmi U., Z. Wang, K. Waern, C. Shou, D. Raha, *et al.*, 2008 The transcriptional landscape of the yeast genome defined by RNA sequencing. *Science* 320: 1344-1349.
- St Charles J. and T. D. Petes, 2013 High-resolution mapping of spontaneous mitotic recombination hotspots on the 1.1 Mb arm of yeast chromosome IV. *PLoS Genet.* 9: e1003434.
- Szilard R. K., P. E. Jacques, L. Laramée, B. Cheng, S. Galicia, *et al.*, 2010 Systematic identification of fragile sites via genome-wide location of gamma-H2AX. *Nat. Struct. Mol. Biol.* 17: 299-305.
- Yin Y. and T. D. Petes, 2013 Genome-wide high-resolution mapping of UV-induced mitotic recombination events in *Saccharomyces cerevisiae*. *PLoS Genet.* 9: e1003894.

**Tables S1-S6**

Available for download as Excel files at <http://www.genetics.org/lookup/suppl/doi:10.1534/genetics.114.164517/-/DC1>

**Table S1** Classes of LOH events in sectored colonies of the *exo1* strain Y<sub>Y</sub>29.8 treated with 15 J/m<sup>2</sup> of UV

**Table S2** SGD coordinates for LOH transitions in the *exo1* strain Y<sub>Y</sub>29.8 induced by a UV dose of 15 J/m<sup>2</sup> in G1-synchronized cells

**Table S3** Classes of spontaneous reciprocal crossovers in red/white sectored colonies of the strain Y<sub>Y</sub>34

**Table S4** SGD coordinates for transitions in *exo1* spontaneous sectors

**Table S5** Analysis of over- or under-represented genome elements within spontaneous and unselected UV-induced conversion tracts in the *exo1* mutant

**Table S6** Strain construction
